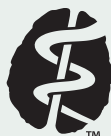

# The American Journal of Psychiatry

Official Journal of the American Psychiatric Association

## Officers 2015–2016

### President

Renée L. Binder, M.D.

### President-Elect

Maria A. Oquendo, M.D.

### Treasurer

Frank W. Brown, M.D.

### Secretary

Altha J. Stewart, M.D.

### Assembly

#### Speaker

Glenn A. Martin, M.D.

#### Speaker-Elect

Daniel J. Anzia, M.D.

#### Recorder

Theresa Miskimen, M.D.

### Office of the CEO and Medical Director

#### CEO and Medical Director

Saul Levin, M.D., M.P.A.

### Board of Trustees

Jeffrey Akaka, M.D.

Lama Bazzi, M.D.

R. Scott Benson, M.D.

Ronald M. Burd, M.D.

Stella Cai, M.D.

Brian Crowley, M.D.

Anita S. Everett, M.D.

Jeffrey L. Geller, M.D., M.P.H.

Dilip V. Jeste, M.D.

Jeffrey A. Lieberman, M.D.

Vivian B. Pender, M.D.

Gail E. Robinson, M.D.

Ravi N. Shah, M.D.

Paul Summergrad, M.D.

Melinda Young, M.D.

## Editorial Board

### Editor

Robert Freedman, M.D.

### Deputy Editors

David A. Lewis, M.D.

Robert Michels, M.D.

Daniel S. Pine, M.D.

A. John Rush, M.D.

Susan K. Schultz, M.D.

Carol A. Tamminga, M.D.

### Associate Editors

Alan Brown, M.D., M.P.H.

Tyrone Cannon, Ph.D.

Benjamin G. Druss, M.D., M.P.H.

Graham J. Emslie, M.D.

Daniel C. Javitt, M.D.

Bankole Johnson, M.D.

Ellen Leibenluft, M.D.

Joan L. Luby, M.D.

Constantine G. Lyketsos, M.D., M.H.S.

Helen S. Mayberg, M.D., F.R.C.P.C.

Barbara Milrod, M.D.

Terrie E. Moffitt, Ph.D.

Anita Thapar, M.B.B.Ch., F.R.C.Psych.,

Ph.D., F.Med.Sci.

Mauricio Tohen, M.D., Dr.PH., M.B.A.

Eduard Vieta, M.D., Ph.D.

Katherine L. Wisner, M.D., M.S.

Xin Yu, M.D.

### Editor Emerita

Nancy C. Andreasen, M.D., Ph.D.

### Former Editors

Amariah Brigham, M.D., 1844–1849

T. Romeyn Beck, M.D., 1849–1854

John P. Gray, M.D., 1854–1886

G. Alder Blumer, M.D., 1886–1894

Richard Dewey, M.D., 1894–1897

Henry M. Hurd, M.D., 1897–1904

Edward N. Brush, M.D., 1904–1931

Clarence B. Farrar, M.D., 1931–1965

Francis J. Braceland, M.D., 1965–1978

John C. Nemiah, M.D., 1978–1993

### Editorial Staff

#### Executive Editor

Michael D. Roy

#### Senior Editors

John J. Guardiano, Ph.D.

Jane Weaver

#### Production Manager

Susan Westrate

#### Assistant Editor

Angela Moore

#### Online Content Manager

Michael Pogachar

#### Editorial Support Services Manager

Heidi Koch

#### Editorial Assistant

Linda LaCour

#### Editorial Assistant/ Permissions Coordinator

Elizabeth Stern

#### Assistants to the Editors

Lois Lilienthal

Laura English

Rachel Hogg

Russell A. Scholl

### Publisher

Rebecca D. Rinehart

# The Residents' JOURNAL

## The American Journal of Psychiatry Residents' Journal

February 2016

Volume 11

Issue 2

### Inside

- 2 Race and Psychiatry**  
Jacqueline Landess, M.D., J.D., and Aparna Atturu, M.D.  
*Elucidating the implicit bias in psychiatric practice and the role of cultural competency models in psychiatric training.*
- 3 Immigration and Risk of Psychiatric Disorders: A Review of Existing Literature**  
Julia Shekunov, M.D.  
*Examining epidemiological studies on the prevalence of psychiatric disorders among immigrants, including discussion on migration-related factors.*
- 6 Prevalence and Determinants of Psychiatric Disorders Among South Asians in America**  
Molly Lubin, M.D., and Abhisek Chandan Khandai, M.D.  
*Identifying specific mental health challenges in South Asians in America, with assessment of lifetime prevalence, predictors of psychiatric distress, and challenges to diagnosis and treatment.*
- 10 Undocumented Immigrants in Psychiatric Wards**  
Mike Wei, Katherine Lubarsky, M.D., and Bernadine Han, M.D.  
*Analyzing the case of a monolingual, undocumented Honduran man with psychosis who was brought to the emergency department and later repatriated.*
- 12 Raising Mental Health Awareness by Utilizing Local Vietnamese Media Channels: A Residents-Initiated Community Outreach Project**  
Theresa Bui, D.O.  
*Commentary on a live radio talk show designed to decrease stigma and promote mental health awareness in the Vietnamese American community.*
- 13 Addressing the Legacy of Racism in Psychiatric Training**  
Morgan Medlock, M.D., M.Div., Anna Weissman, M.D., Shane Shucheng Wong, M.D., and Andrew D. Carlo, M.D.  
*Historical perspective on implicit racial attitudes and the effect of interpersonal racism on psychiatric practice.*

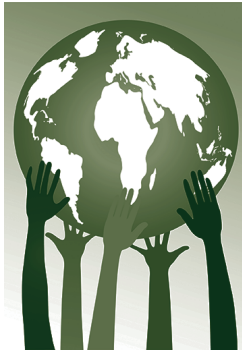

#### Editor-in-Chief

Rajiv Radhakrishnan, M.B.B.S., M.D.

**Senior Deputy Editor**  
Katherine Pier, M.D.

**Deputy Editor**  
Hun Millard, M.D., M.A.

#### Guest Editors

Jacqueline Landess, M.D., J.D.,  
Aparna Atturu, M.D.

**Associate Editors**  
Rafik Sidaros, M.B.B.Ch.  
Janet Charoensook, M.D.

**Staff Editor**  
Angela Moore

#### Editors Emeriti

Sarah B. Johnson, M.D.  
Molly McVoy, M.D.  
Joseph M. Cerimele, M.D.  
Sarah M. Fayad, M.D.  
Monifa Seawell, M.D.  
Misty Richards, M.D., M.S.

#### Editor-in-Chief

Rajiv Radhakrishnan, M.B.B.S., M.D.

**Senior Deputy Editor**  
Katherine Pier, M.D.

**Deputy Editor**  
Hun Millard, M.D., M.A.

**Associate Editors**  
Rafik Sidaros, M.B.B.Ch.  
Janet Charoensook, M.D.

*The Residents' Journal*, the largest and most robust resident-led journal in the house of medicine, is an e-publication that serves as a forum to share your ideas and experiences in training, clinical practice, research, and careers with your colleagues.

To submit a manuscript, please visit [mc.manuscriptcentral.com/appi-ajp](http://mc.manuscriptcentral.com/appi-ajp) and select a manuscript type for AJP Residents' Journal. You may submit a commentary (500 words), book review (500 words), history of psychiatry (500 words), clinical case conference (1,250 words), review article (1,500 words), treatment in psychiatry article (1,500 words), research article (1,250 words), drug review (1,500 words), or letter to the editor (250 words).

*The Residents' Journal* is sent free-of-charge to all psychiatry residents. Anyone interested in being included on the distribution list should contact Angela Moore, *The Residents' Journal* staff editor at [ajp@psych.org](mailto:ajp@psych.org) with "Subscribe to Residents' Journal" in the subject line.

To access the complete Residents' Journal archives, visit [ajp.psychiatryonline.org/residents\\_journal](http://ajp.psychiatryonline.org/residents_journal)

# There's So Much More to AJP Than Meets the Page!

Visit *The American Journal of Psychiatry's* website on PsychiatryOnline for the following features!

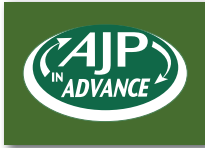

## AJP in Advance

The very latest research advances!

At **AJP in Advance**, you can discover the following before their appearance in print:

### Gating Deficit Heritability and Correlation With Increased Clinical Severity in Schizophrenia Patients With Positive Family History

Two neurophysiological phenotypes for schizophrenia, prepulse inhibition and P50 gating, were more heritable in multiply affected families than in families with a single affected member. Schizophrenia probands in multiply affected families also had more severe symptoms.

### Comprehensive Versus Usual Community Care for First-Episode Psychosis: 2-Year Outcomes From the NIMH RAISE Early Treatment Program

A program combining medication management, family psychoeducation, individual therapy, and supported employment and education can be provided in community clinics to patients in their first episode of psychosis and is superior to usual care for quality of life, symptom ratings, and participation in school or work. The effects are especially pronounced for patients whose illness has lasted less than 74 weeks.

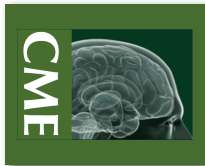

## AJP CME

Three articles in this issue form the basis of a short course with questions that can be answered for up to 1 *AMA PRA Category 1 Credit™* each by visiting <http://psychiatryonline.org/cme> and clicking on the "**American Journal of Psychiatry**" tab. CME credit is issued only **online**, and a paid subscription to AJP CME course program is required. This month's courses appear on pages 307–310.

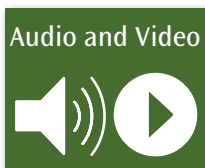

## Have You Heard?

With AJP Audio you can listen to highlights of this issue. This month, Deputy Editor Susan K. Schultz, M.D., discusses depression following stroke, cerebral abnormalities in patients with first-episode schizophrenia, risks of poorly monitored ketamine use for depression, long-term outcomes of light therapy versus CBT for seasonal affective disorder, the reproductive safety of second-generation antipsychotics, and the effects of antipsychotic review and nonpharmacological interventions on antipsychotic use, symptoms, and mortality in nursing home residents.

Also, visit the online edition of this month's *Journal* to view a video of Deputy Editor Daniel S. Pine, M.D., presenting highlights from the issue.

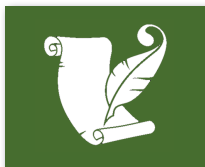

## Revisit the field's rich history!

### 50 years ago this month: Special section on community psychiatry

The March 1966 issue contains nearly a dozen articles on community psychiatry, including overviews of issues and policies and of theoretical considerations, as well as articles on specific aspects of community psychiatry, such as social factors, hospital settings, and the role of the federal government.

### 25 years ago this month: Genetics, psychiatry, and environmental effects

In the March 1991 issue, as the genetics revolution in psychiatry gathered momentum, Drs. David Reiss, Robert Plomin, and E. Mavis Hetherington note in a review article that "the genetic data are among the best data we have supporting the importance of environmental mechanisms in both normal and pathological development. Even more intriguing, these genetic data are yielding a clear picture of the types of environmental effects likely to be most important." The authors focus especially on nonshared environmental effects, including human relationships, within families.

# THE AMERICAN PSYCHIATRIC ASSOCIATION

1000 Wilson Blvd., Suite 1825, Arlington, VA 22209-3901  
(888) 357-7924 (toll-free inside the U.S. and Canada) / (703) 907-7300  
web site: [www.psychiatry.org](http://www.psychiatry.org) • e-mail: [apa@psych.org](mailto:apa@psych.org)

## Chairpersons of Councils, Committees, and Task Forces

### Standing Committees

|                             |                                |
|-----------------------------|--------------------------------|
| <b>Bylaws</b>               | Rebecca W. Brendel, M.D., J.D. |
| <b>Elections</b>            | Barry K. Herman, M.D.          |
| <b>Ethics</b>               | Ezra Griffith, M.D.            |
| <b>Finance and Budget</b>   | Alan F. Schatzberg, M.D.       |
| <i>Audit</i>                | Frank W. Brown, M.D.           |
| <i>Investment Oversight</i> | David Fassler, M.D.            |
| <b>Joint Reference</b>      | Maria A. Oquendo, M.D.         |
| <b>Membership</b>           | Rahn K. Bailey, M.D.           |
| <b>Nominating</b>           | Paul Summergrad, M.D.          |
| <b>Tellers</b>              | Catherine May, M.D.            |

### Councils

#### Council on Addiction Psychiatry

Frances R. Levin, M.D.

#### Council on Advocacy and Government Relations

Barry B. Perlman, M.D.

*Advocacy and Litigation Funding*

Jeffrey Akaka, M.D.

#### Council on Children, Adolescents, and Their Families

Joseph V. Penn, M.D.

*Agnes Purcell McGavin Award*

Robert Lee Hendren, M.D.

*Blanche F. Ittleson Research Award*

Michael Houston, M.D.

#### Council on Communications

Arshya Vahabzadeh, M.D.

#### Council on Geriatric Psychiatry

Robert P. Roca, M.D.

#### Council on Healthcare Systems and Financing

Harsh K. Trivedi, M.D.

*Reimbursement for Psychiatric Care*

Bruce J. Schwartz, M.D.

*RBRVS, Codes and Reimbursement*

Gregory G. Harris, M.D.

#### Council on International Psychiatry

Michelle Riba, M.D.

#### Council on Medical Education and Lifelong Learning

Richard F. Summers, M.D.

*American Leadership Fellowship Selection*

Leah J. Dickstein, M.D., M.A.

*APA Public Psychiatry Fellowship Selection Committee*

Derri Shtasel, M.D.

*APA/SAMHSA Minority Fellowship Selection and Advisory*

Roberto Lewis-Fernandez, M.D.

*Scientific Program*

Steven Koh, M.D.

*Vestermark Award Committee*

Jonathan F. Borus, M.D.

#### Council on Minority Mental Health and Health Disparities

Christina V. Mangurian, M.D.

#### Council on Psychiatry And Law

Steven K. Hoge, M.D.

*Isaac Ray/Human Rights Award*

Liza Hannah Gold, M.D.

*Judicial Action*

Marvin S. Swartz, M.D.

*Manfred S. Guttmacher Award*

David A. Lowenthal, M.D.

#### Council on Psychosomatic Medicine

##### (Consultation Liaison Psychiatry)

David F. Gitlin, M.D.

#### Council on Quality Care

Grayson Norquist, M.D.

*Mental Health Information Technology*

Steven Roy Daviss, M.D.

*Performance Measures*

Karen Pierce, M.D.

*Steering Committee on Practice Guidelines*

Michael J. Vergare, M.D.

#### Council on Research

Dwight L. Evans, M.D.

*Psychiatric Dimensions of Disasters*

Robert J. Ursano, M.D.

*Research Awards*

Matthew W. State, M.D.

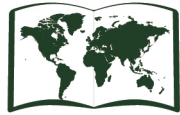

# SHARP

Shanghai Archives of Psychiatry · Since 1959

上 海 精 神 医 学

WWW.SHANGHAIARCHIVESOFPSYCHIATRY.ORG

OCTOBER 2015 • VOL. 27 • NO. 5

## IN THIS ISSUE

<http://dx.doi.org/10.11919/j.issn.1002-0829.216008>

### SYSTEMATIC REVIEW AND META-ANALYSIS

**Meta-analysis of the relationship of peripheral retinal nerve fiber layer thickness to Alzheimer's disease and mild cognitive impairment**

Meijuan WANG, Yinbo ZHU, Zhongyong SHI, Chunbo LI, Yuan SHEN

<http://dx.doi.org/10.11919/j.issn.1002-0829.215100>

### ORIGINAL RESEARCH ARTICLES

**Adjunctive treatment with high frequency repetitive transcranial magnetic stimulation for the behavioral and psychological symptoms of patients with Alzheimer's disease: a randomized, double-blind, shamcontrolled study**

Yue WU, Wenwei XU, Xiaowei LIU, Qing XU, Li TANG, Shuyan WU

<http://dx.doi.org/10.11919/j.issn.1002-0829.215107>

**Effectiveness of Traditional Chinese Medicine (TCM) treatments on the cognitive functioning of elderly persons with mild cognitive impairment associated with white matter lesions**

Hong ZHANG, Chenhu LI, Liyu ZHAO, Guilai ZHAN

<http://dx.doi.org/10.11919/j.issn.1002-0829.215109>

**Assessment of a six-week computer-based remediation program for social cognition in chronic schizophrenia**

Linda K BYRNE, Lingyi PAN, Marita McCABE, David MELLOR, Yifeng XU

<http://dx.doi.org/10.11919/j.issn.1002-0829.215095>

## FORUM

**Heredity in comorbid bipolar disorder and obsessive-compulsive disorder patients**

Andrea AMERIO, Matteo TONNA, Anna Odone, Brendon STUBBS, S. Nassir GHAEMI

<http://dx.doi.org/10.11919/j.issn.1002-0829.215123>

### CASE REPORT

**Infanticide by a mother with untreated schizophrenia**

Rahul SAHA, Shubh Mohan SINGH, Anil NISCHAL

<http://dx.doi.org/10.11919/j.issn.1002-0829.215058>

**Sudden cardiac death after modified electroconvulsive therapy**

Zhihui WANG, Jiyu WANG

<http://dx.doi.org/10.11919/j.issn.1002-0829.214169>

### BIostatistics in Psychiatry (29)

**The effect of simple imputation on inferences about population means when data are missing in biomedical research due to detection limits**

Hongyue WANG, Guanqing CHEN, Xiang LU, Hui ZHANG, Changyong FENG

<http://dx.doi.org/10.11919/j.issn.1002-0829.215121>

### COMMENTARY

**Persistent mental symptoms and rabies**

Hasan Tahsin GOZDAS, Mustafa HATIPOGLU

<http://dx.doi.org/10.11919/j.issn.1002-0829.215049>
